# Supplementary material for: Highly selective fluorogenic anion chemosensors: naked-eye detection of F− and AcO− ions in natural water using a test strip
Source: Royal Society of Chemistry journal article supplement (doi:10.1039/c3ay40686e), 2013-01-01
Supplement: c3ay40686e.pdf [file c3ay40686e.pdf]

## Supplementary Data

### Highly Selective Fluorogenic Anion Chemosensors: Naked-eye Detection of F<sup>-</sup> and AcO<sup>-</sup> ions in Natural Water using a Test Strip

**Moorthy Saravana Kumar, Saravana Loganathan Ashok Kumar  
Anandram Sreekanth\***

*Department of Chemistry, Centre of Excellence in Corrosion and Surface Engineering,  
National Institute of Technology- Tiruchirappalli,  
Tiruchirappalli 620015, Tamilnadu, India*

\*Corresponding Author: Tel: +91 431 2503642; Fax: +91 431 2500133;  
E-mail: [sreekanth@nitt.edu](mailto:sreekanth@nitt.edu)

#### Table of Contents:

**Fig. S1.** <sup>1</sup>H NMR spectrum of the S1 (400 MHz) in DMSO-*d*<sub>6</sub> solvent. (Inset: Expansion of the aromatic proton region 6.3-7.8 ppm).

**Fig. S2.** <sup>1</sup>H NMR spectrum of the S2 (400 MHz) in DMSO-*d*<sub>6</sub> solvent.

**Fig. S3.** UV-visible spectra of S1 (5 x 10<sup>-5</sup> M) in DMSO solution upon addition of 3 equiv. of different anions as their tetrabutylammounium salt respectively.

**Fig. S4.** UV-visible spectra of S2 (5 x 10<sup>-5</sup> M) in DMSO solution upon addition of 3 equiv. of different anions as their tetrabutylammounium salt respectively.

**Fig. S5.** Comparison bargraph of UV-visible spectra of S1 and S2 (5 x 10<sup>-5</sup> M) in DMSO solution towards F<sup>-</sup> and AcO<sup>-</sup> (3 equiv) anions, respectively.

**Fig. S6.** Job plots for complexation of S1 with (a) fluoride & (b) acetate anions.

**Fig. S7.** Job plots for complexation of S2 with (a) fluoride & (b) acetate anions.

**Fig. S8.** Benesi-Hildebrand plot: UV-visible titration result of S1 with (a) fluoride & (b) acetate anion.

**Fig. S9.** Benesi-Hildebrand plot: UV-visible titration result of S2 with (a) fluoride & (b) acetate anion.

**Fig. S10.** Fluorescence emission spectra of S1 ( $5 \times 10^{-5}$  M) in DMSO solution upon addition of 3 equiv. of different anions as their tetrabutylammonium salt respectively; ( $\lambda_{\text{ex}}$  at 419 nm).

**Fig. S11.** Fluorescence emission spectra of S1 ( $5 \times 10^{-5}$  M) in DMSO solution upon addition of 3 equiv. of different anions as their tetrabutylammonium salt, respectively; ( $\lambda_{\text{ex}}$  at 450 nm).

**Fig. S12.** Comparison bargraph of fluorescence emission spectra of S1 ( $\lambda_{\text{ex}}$  at 419 nm) and S2 ( $\lambda_{\text{ex}}$  at 419 nm) in DMSO solution ( $5 \times 10^{-5}$  M) towards  $\text{F}^-$  and  $\text{AcO}^-$  (3 equiv) anions, respectively.

**Fig. S13.** Changes in emission spectra of S1 in DMSO ( $5 \times 10^{-5}$  M) upon (a) addition of  $\text{F}^-$  & (b)  $\text{AcO}^-$  anions;  $\lambda_{\text{ex}}$  at 450 nm.

**Fig. S14.** Changes in emission spectra of S2 in DMSO ( $5 \times 10^{-5}$  M) upon (a) addition of  $\text{F}^-$  & (b)  $\text{AcO}^-$  anions;  $\lambda_{\text{ex}}$  at 450 nm.

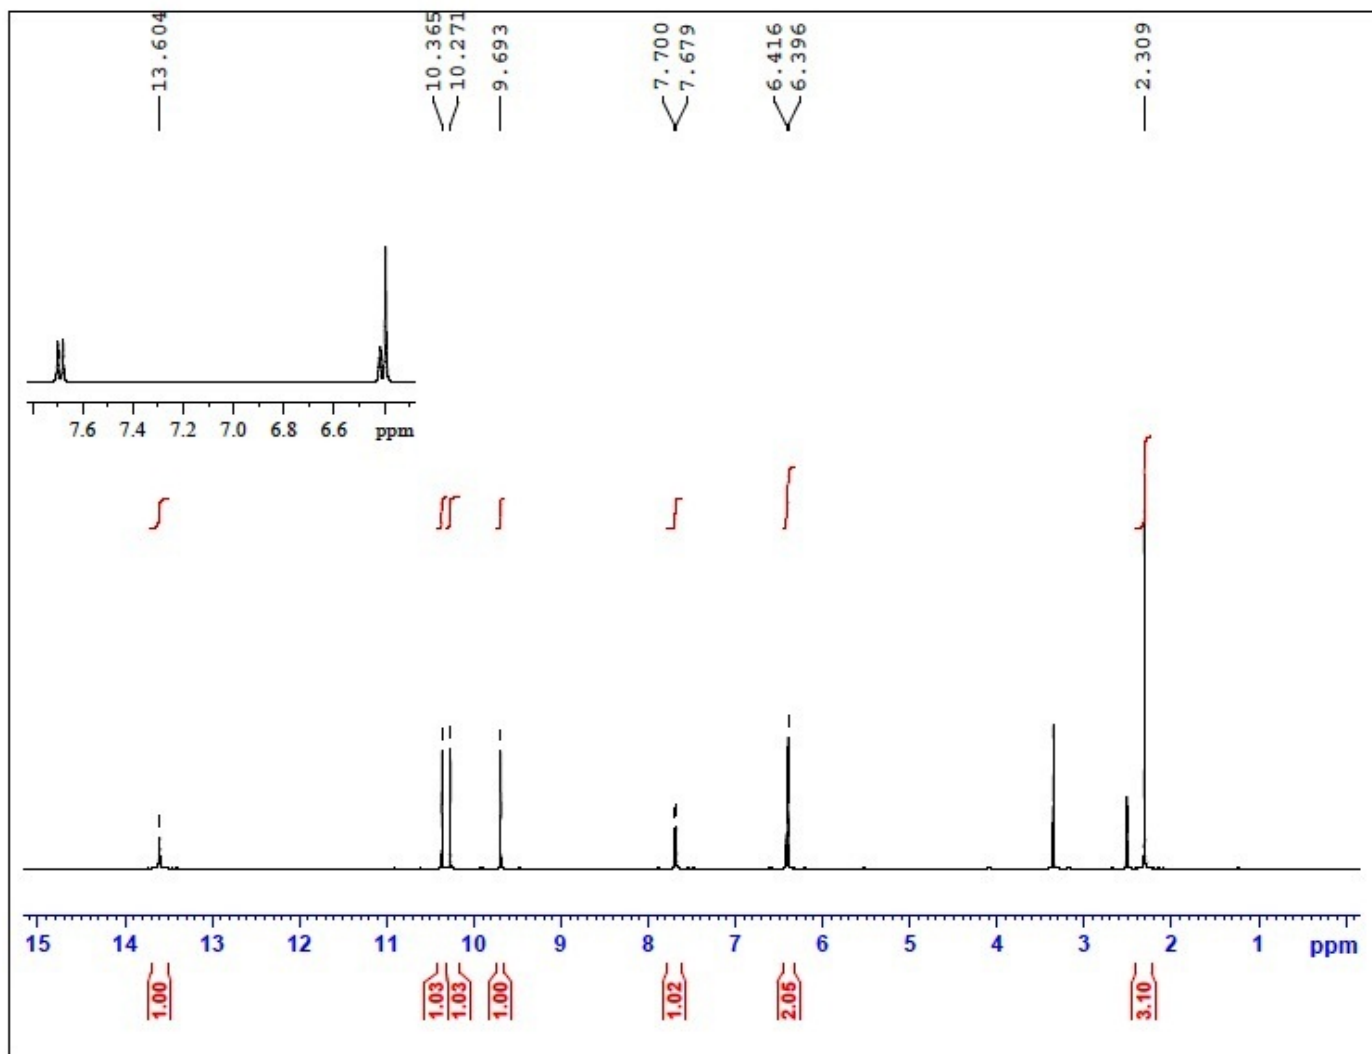

**Fig. S1.**  $^1\text{H}$  NMR spectrum of the S1 (400 MHz) in  $\text{DMSO-}d_6$  solvent. (Inset: Expansion of the aromatic proton region 6.3-7.8 ppm).

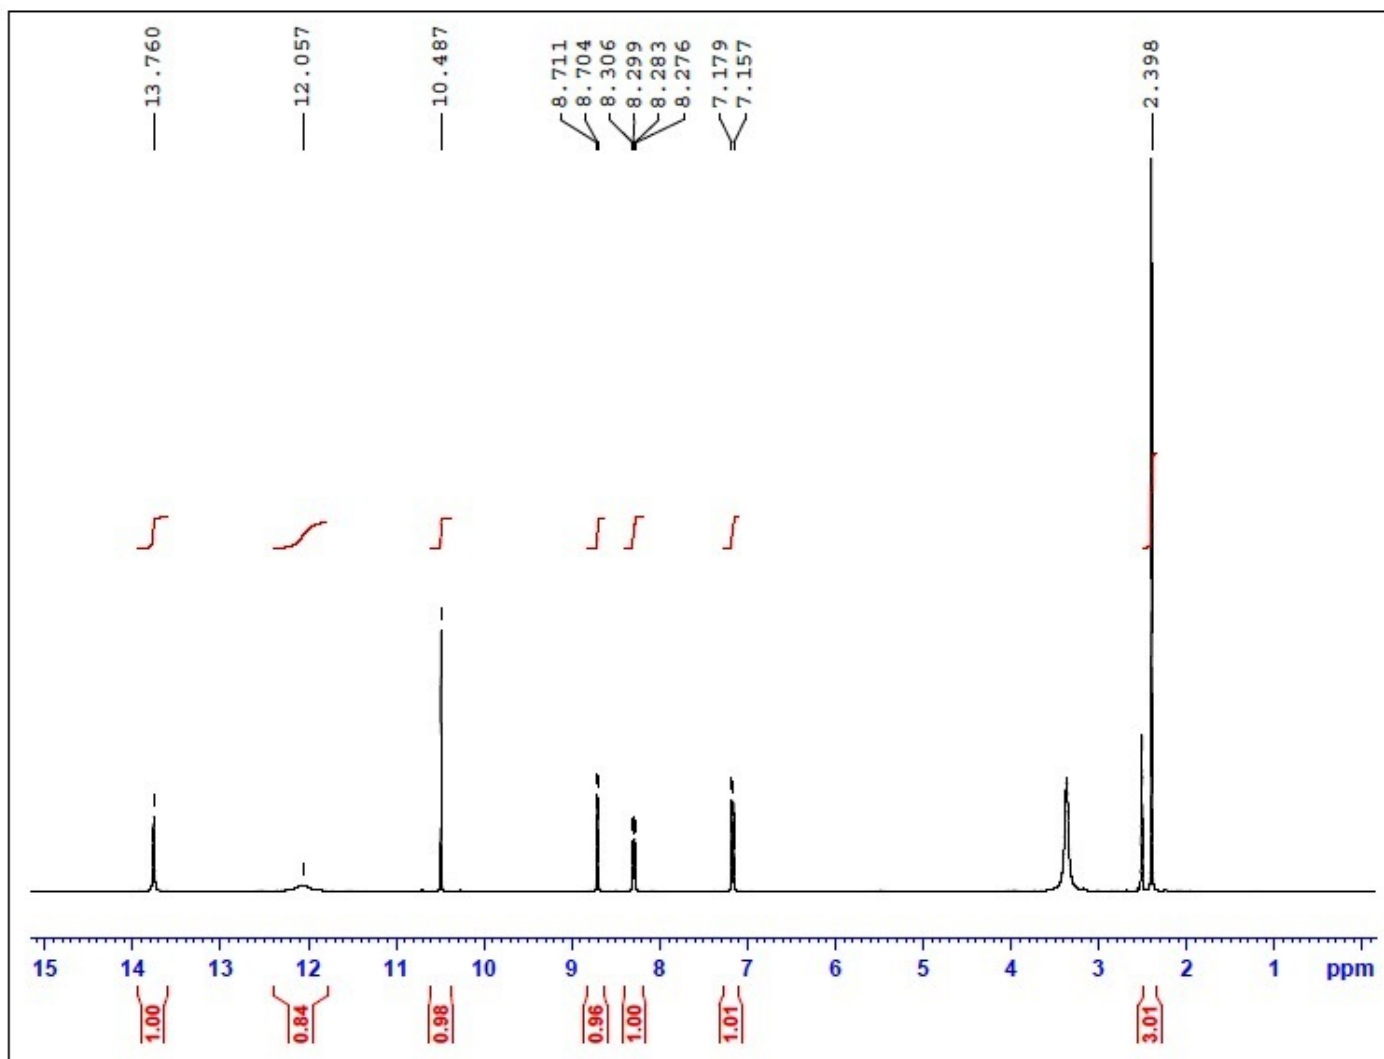

**Fig. S2.**  $^1\text{H}$  NMR spectrum of the S2 (400 MHz) in  $\text{DMSO-}d_6$  solvent.

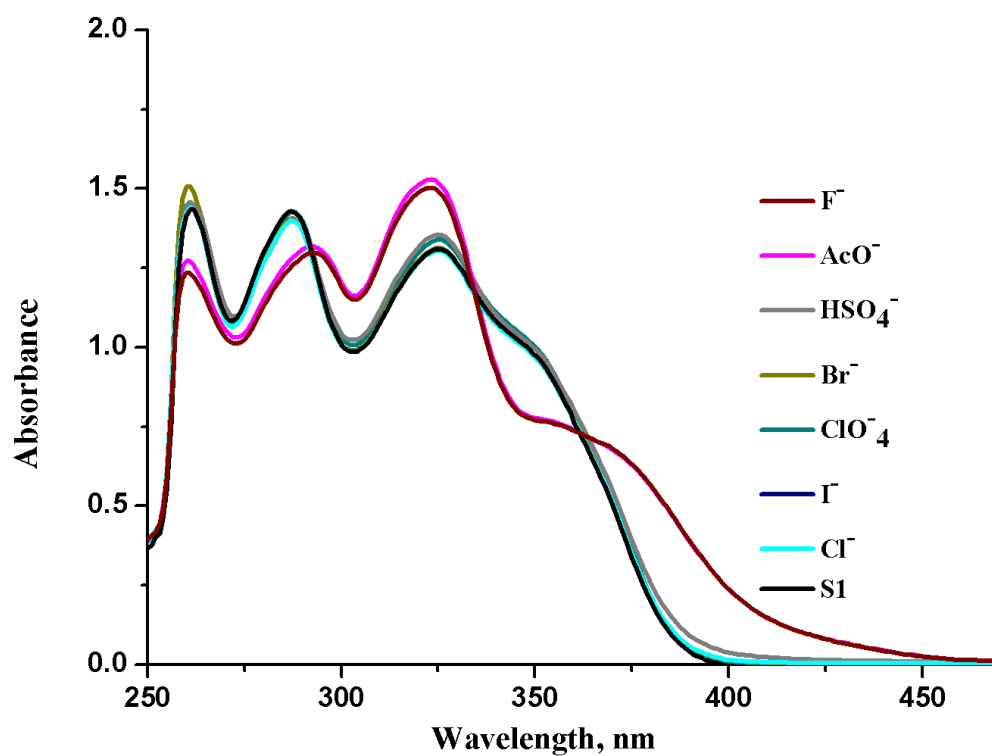

**Fig. S3.** UV-visible spectra of S1 ( $5 \times 10^{-5}$  M) in DMSO solution upon addition of 3 equiv. of different anions as their tetrabutylammonium salt respectively.

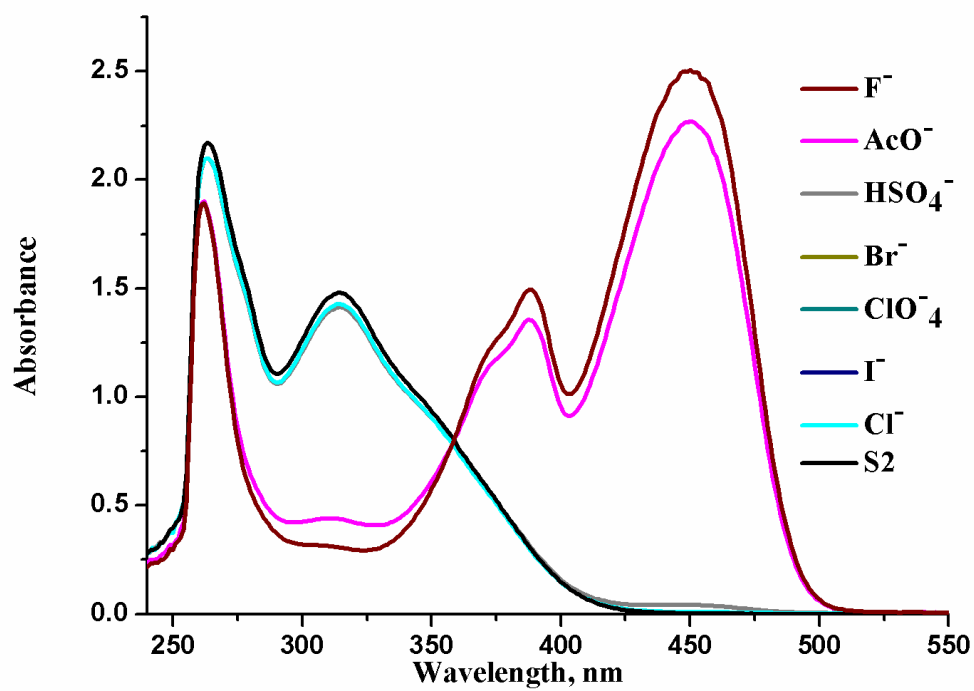

**Fig. S4.** UV-visible spectra of S2 ( $5 \times 10^{-5}$  M) in DMSO solution upon addition of 3 equiv. of different anions as their tetrabutylammonium salt respectively.

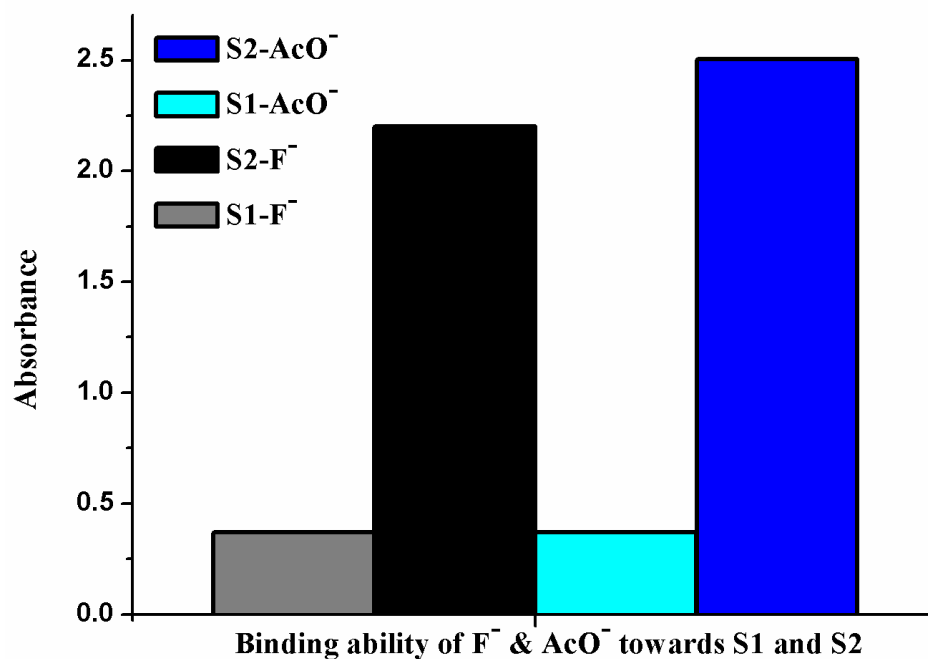

**Fig. S5.** Comparison bargraph of UV-visible spectra of S1 and S2 ( $5 \times 10^{-5}$  M) in DMSO solution towards F<sup>-</sup> and AcO<sup>-</sup> (3 equiv) anions, respectively.

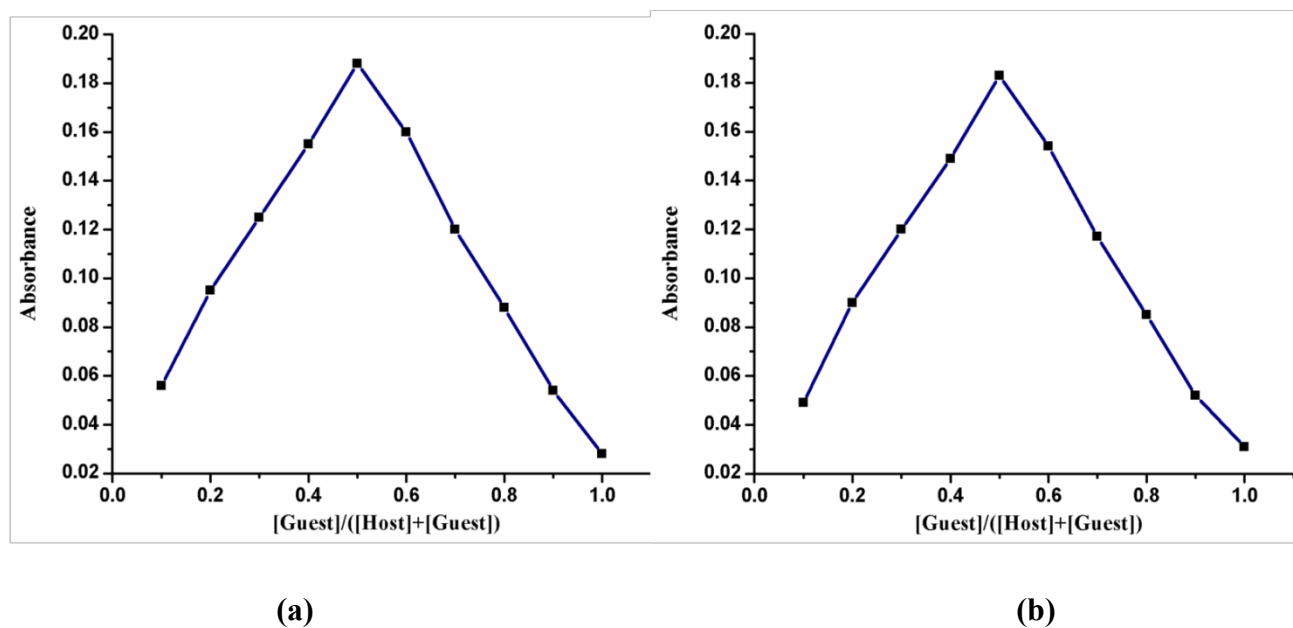

**Fig. S6.** Job plots for complexation of S1 with (a) fluoride & (b) acetate anions.



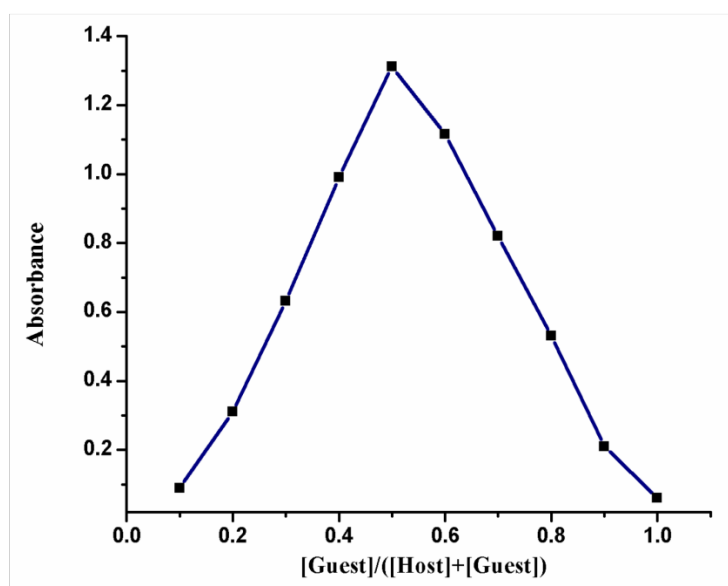

(a)

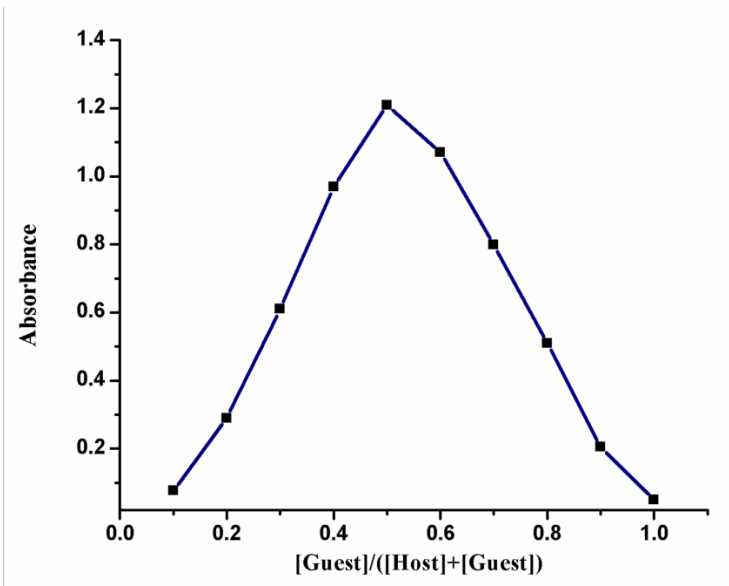

(b)

**Fig. S7.** Job plots for complexation of S2 with (a) fluoride & (b) acetate anions.

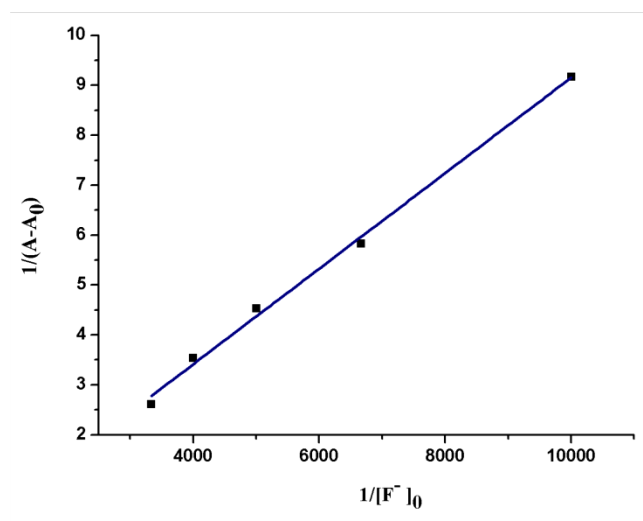

(a)

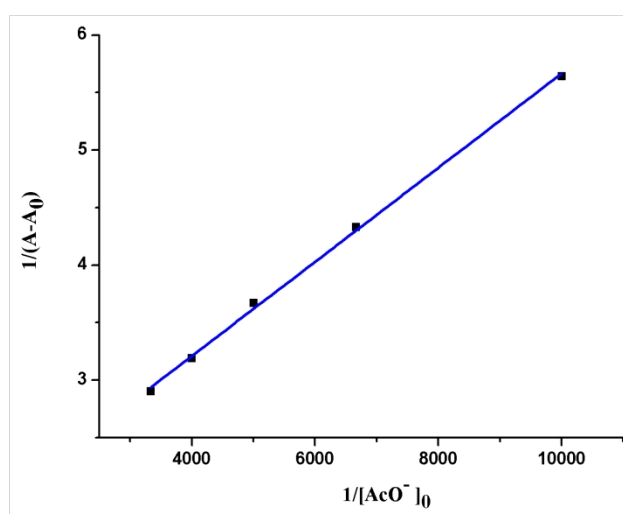

(b)

**Fig. S8.** Benesi-Hildebrand plot: UV-visible titration result of S1 with (a) fluoride & (b) acetate anion.

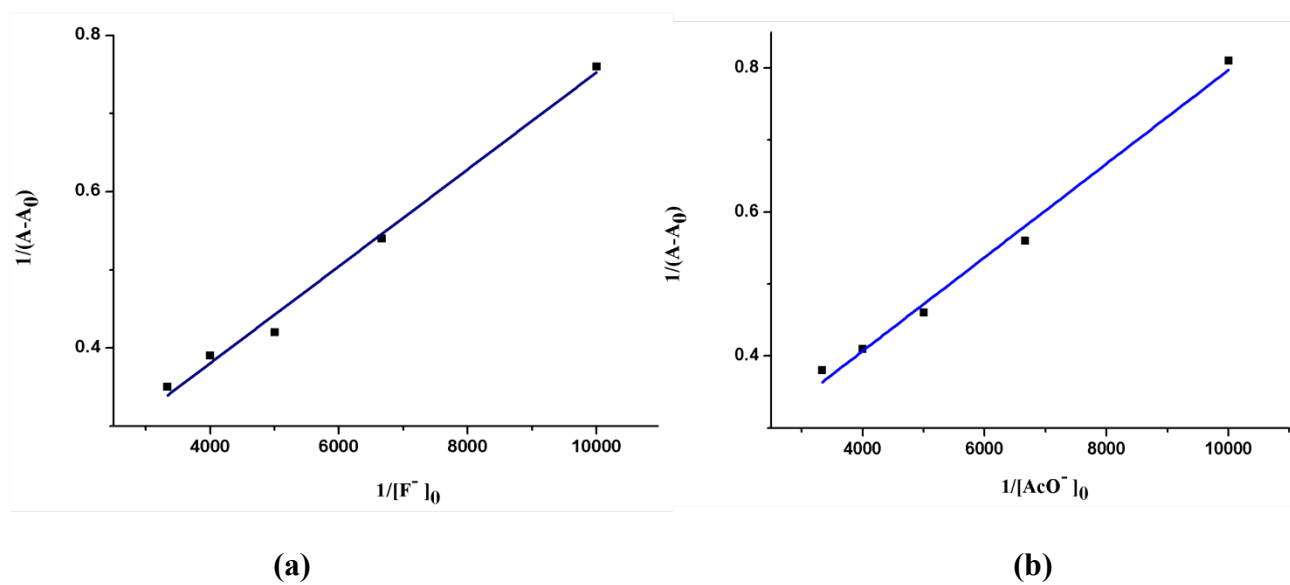

**Fig. S9.** Benesi-Hildebrand plot: UV-visible titration result of S2 with (a) fluoride & (b) acetate anion.

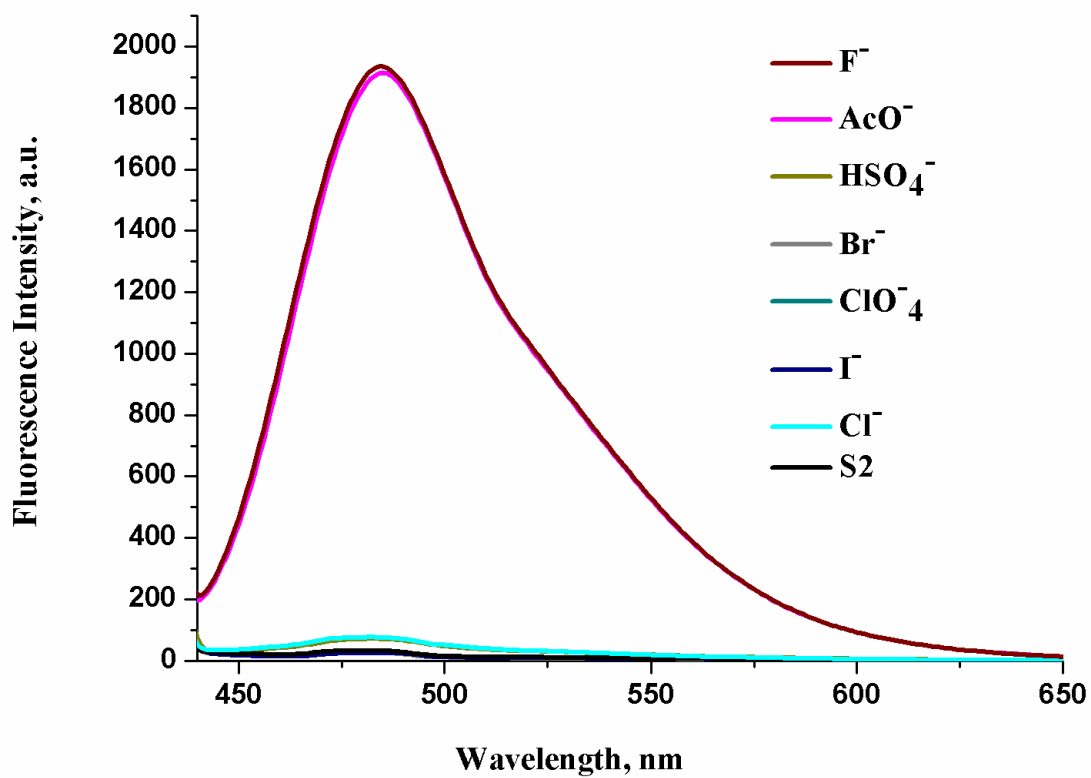

**Fig. S10.** Fluorescence emission spectra of S1 ( $5 \times 10^{-5}$  M) in DMSO solution upon addition of 3 equiv. of different anions as their tetrabutylammonium salt respectively;  $\lambda_{\text{ex}}$  at 419 nm.

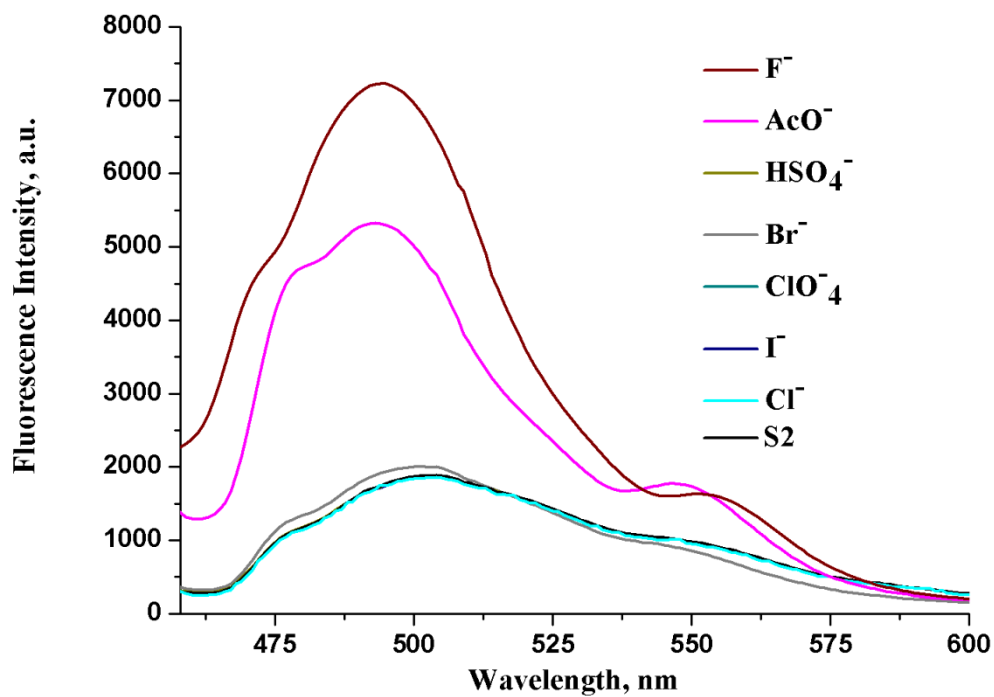

**Fig. S11.** Fluorescence emission spectra of S2 ( $5 \times 10^{-5}$  M) in DMSO solution upon addition of 3 equiv. of different anions as their tetrabutylammonium salt, respectively;  $\lambda_{\text{ex}}$  at 450 nm.

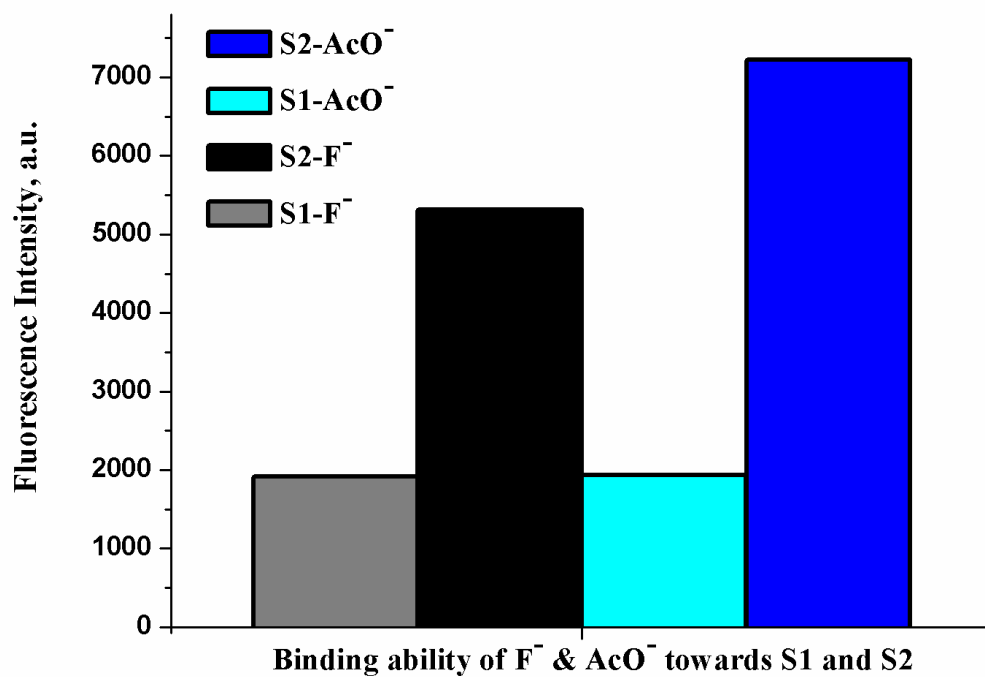

**Fig. S12.** Comparison bargraph of fluorescence emission spectra of S1( $\lambda_{\text{ex}}$  at 419 nm) and S2 ( $\lambda_{\text{ex}}$  at 450 nm) in DMSO solution ( $5 \times 10^{-5}$  M) towards F<sup>-</sup> and AcO<sup>-</sup> (3 equiv) anions, respectively.

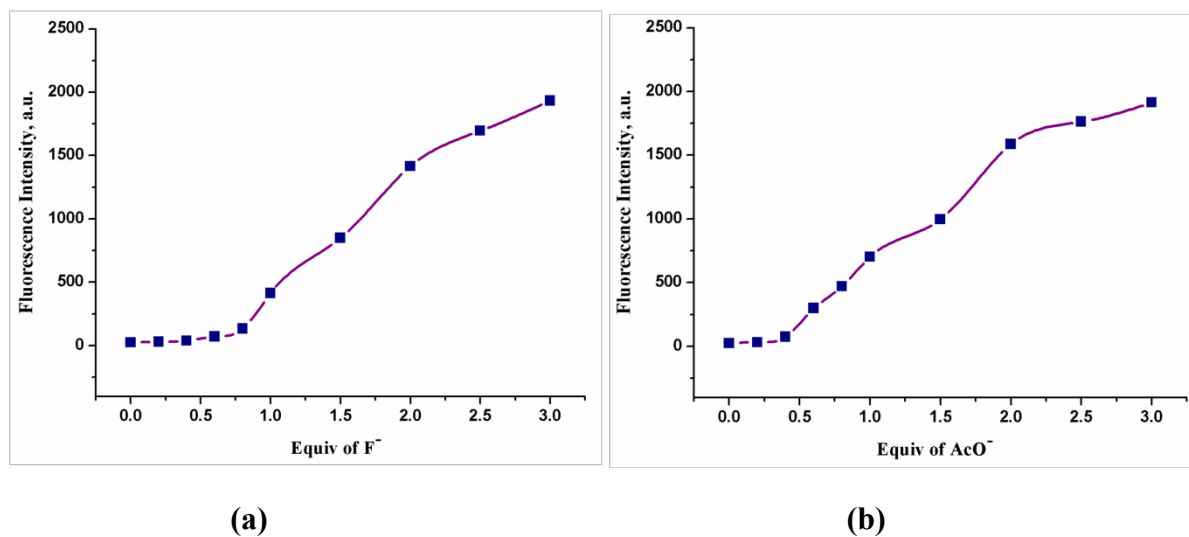

**Fig. S13.** Changes in emission spectra of S1 in DMSO ( $5 \times 10^{-5}$  M) upon (a) addition of F<sup>-</sup> & (b) AcO<sup>-</sup> anions;  $\lambda_{\text{ex}}$  at 450 nm.

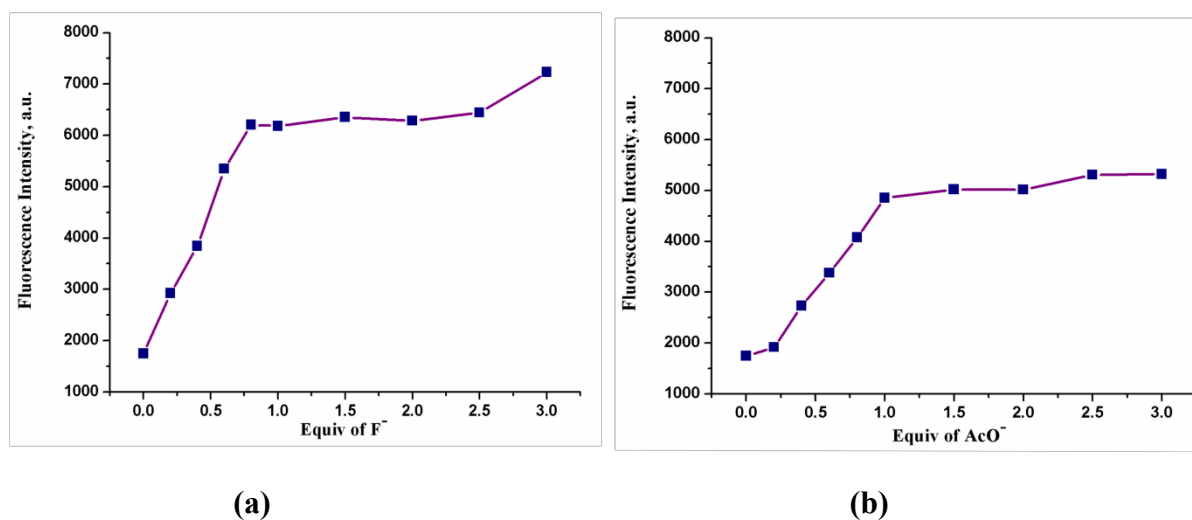

**Fig. S14.** Changes in emission spectra of S2 in DMSO ( $5 \times 10^{-5}$  M) upon (a) addition of F<sup>-</sup> & (b) AcO<sup>-</sup> anions;  $\lambda_{\text{ex}}$  at 450 nm.
